# Supplementary material for: Genome-Wide Identification and Functional Exploration of SBP-Box Gene Family in Black Pepper (Piper nigrum L.)
Source: MDPI journal article supplement (doi:10.3390/genes12111740), 2021-10-29
Supplement: s1 [file s1]

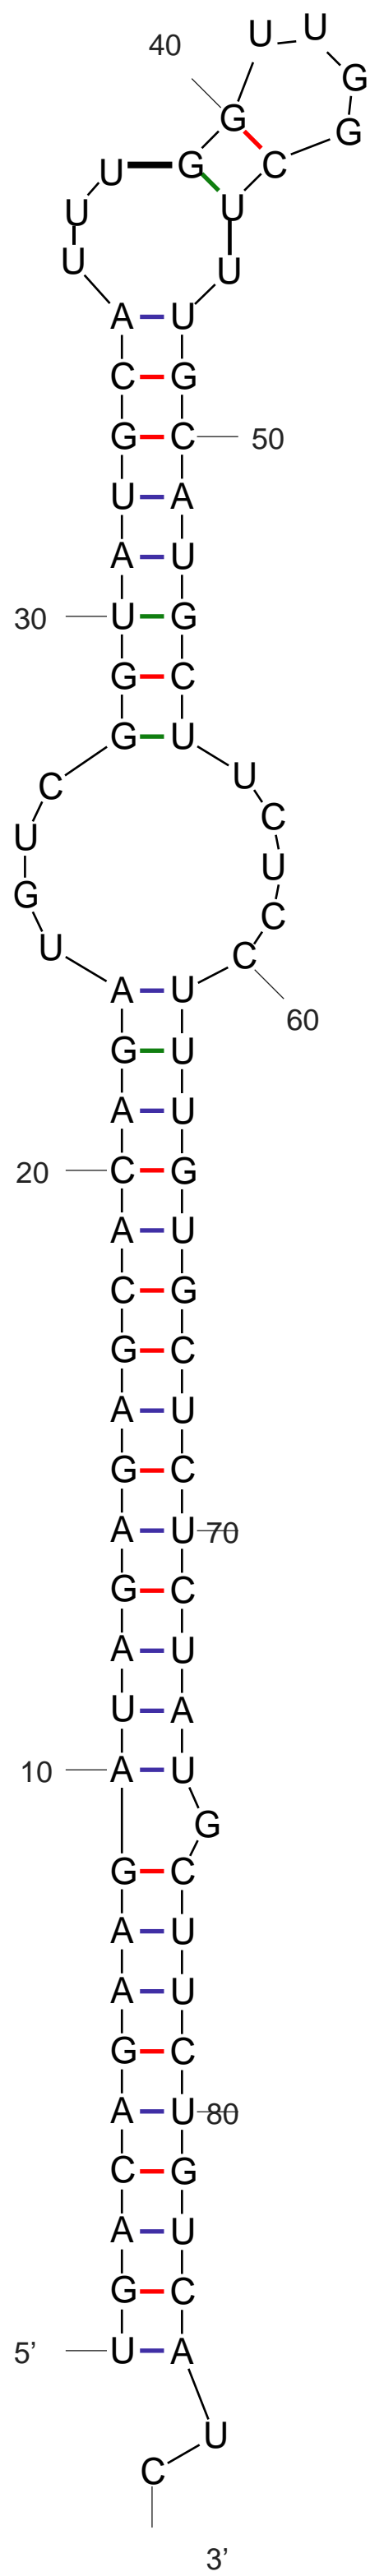

3'  
dG = -44.80 [Initially -44.80] Pn-miR156a

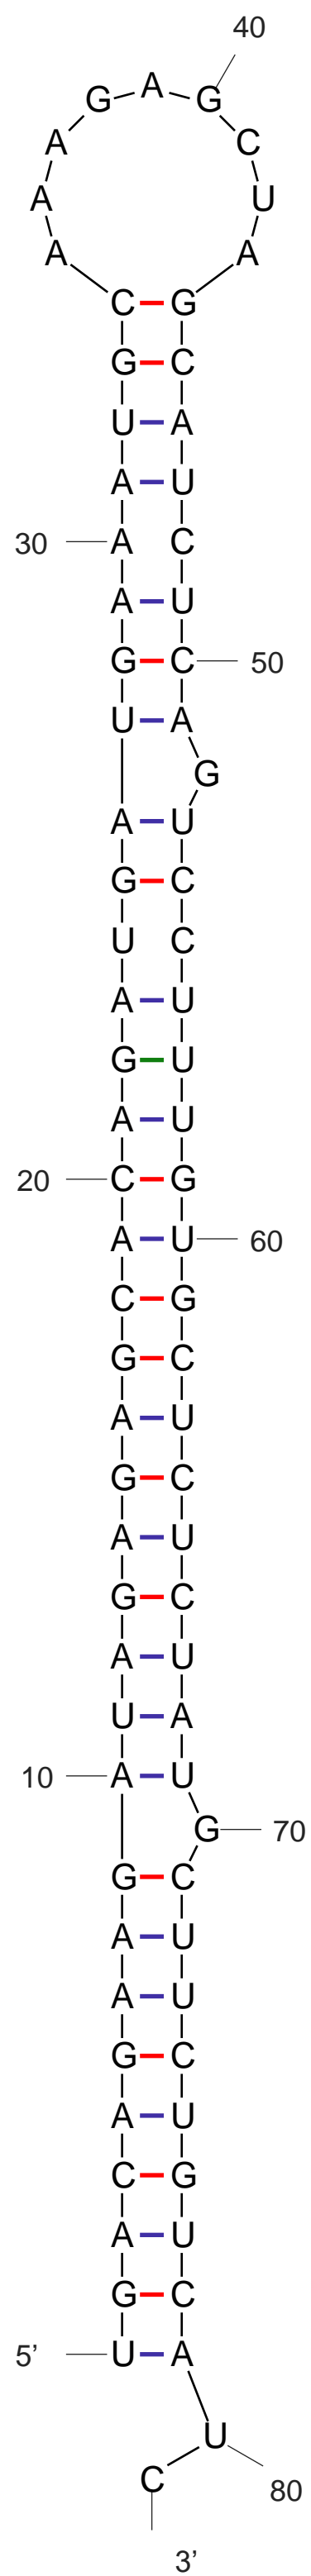

$dG = -43.30$  [Initially -43.30] Pn-miR156b

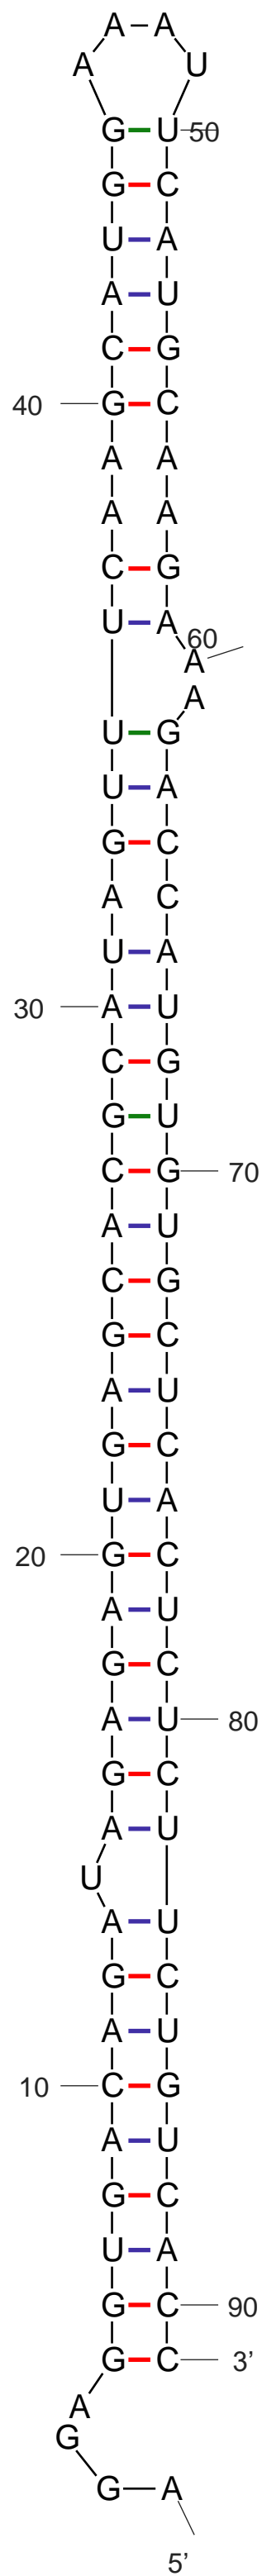

$dG = -55.40$  [Initially -55.40] Pn-miR156c



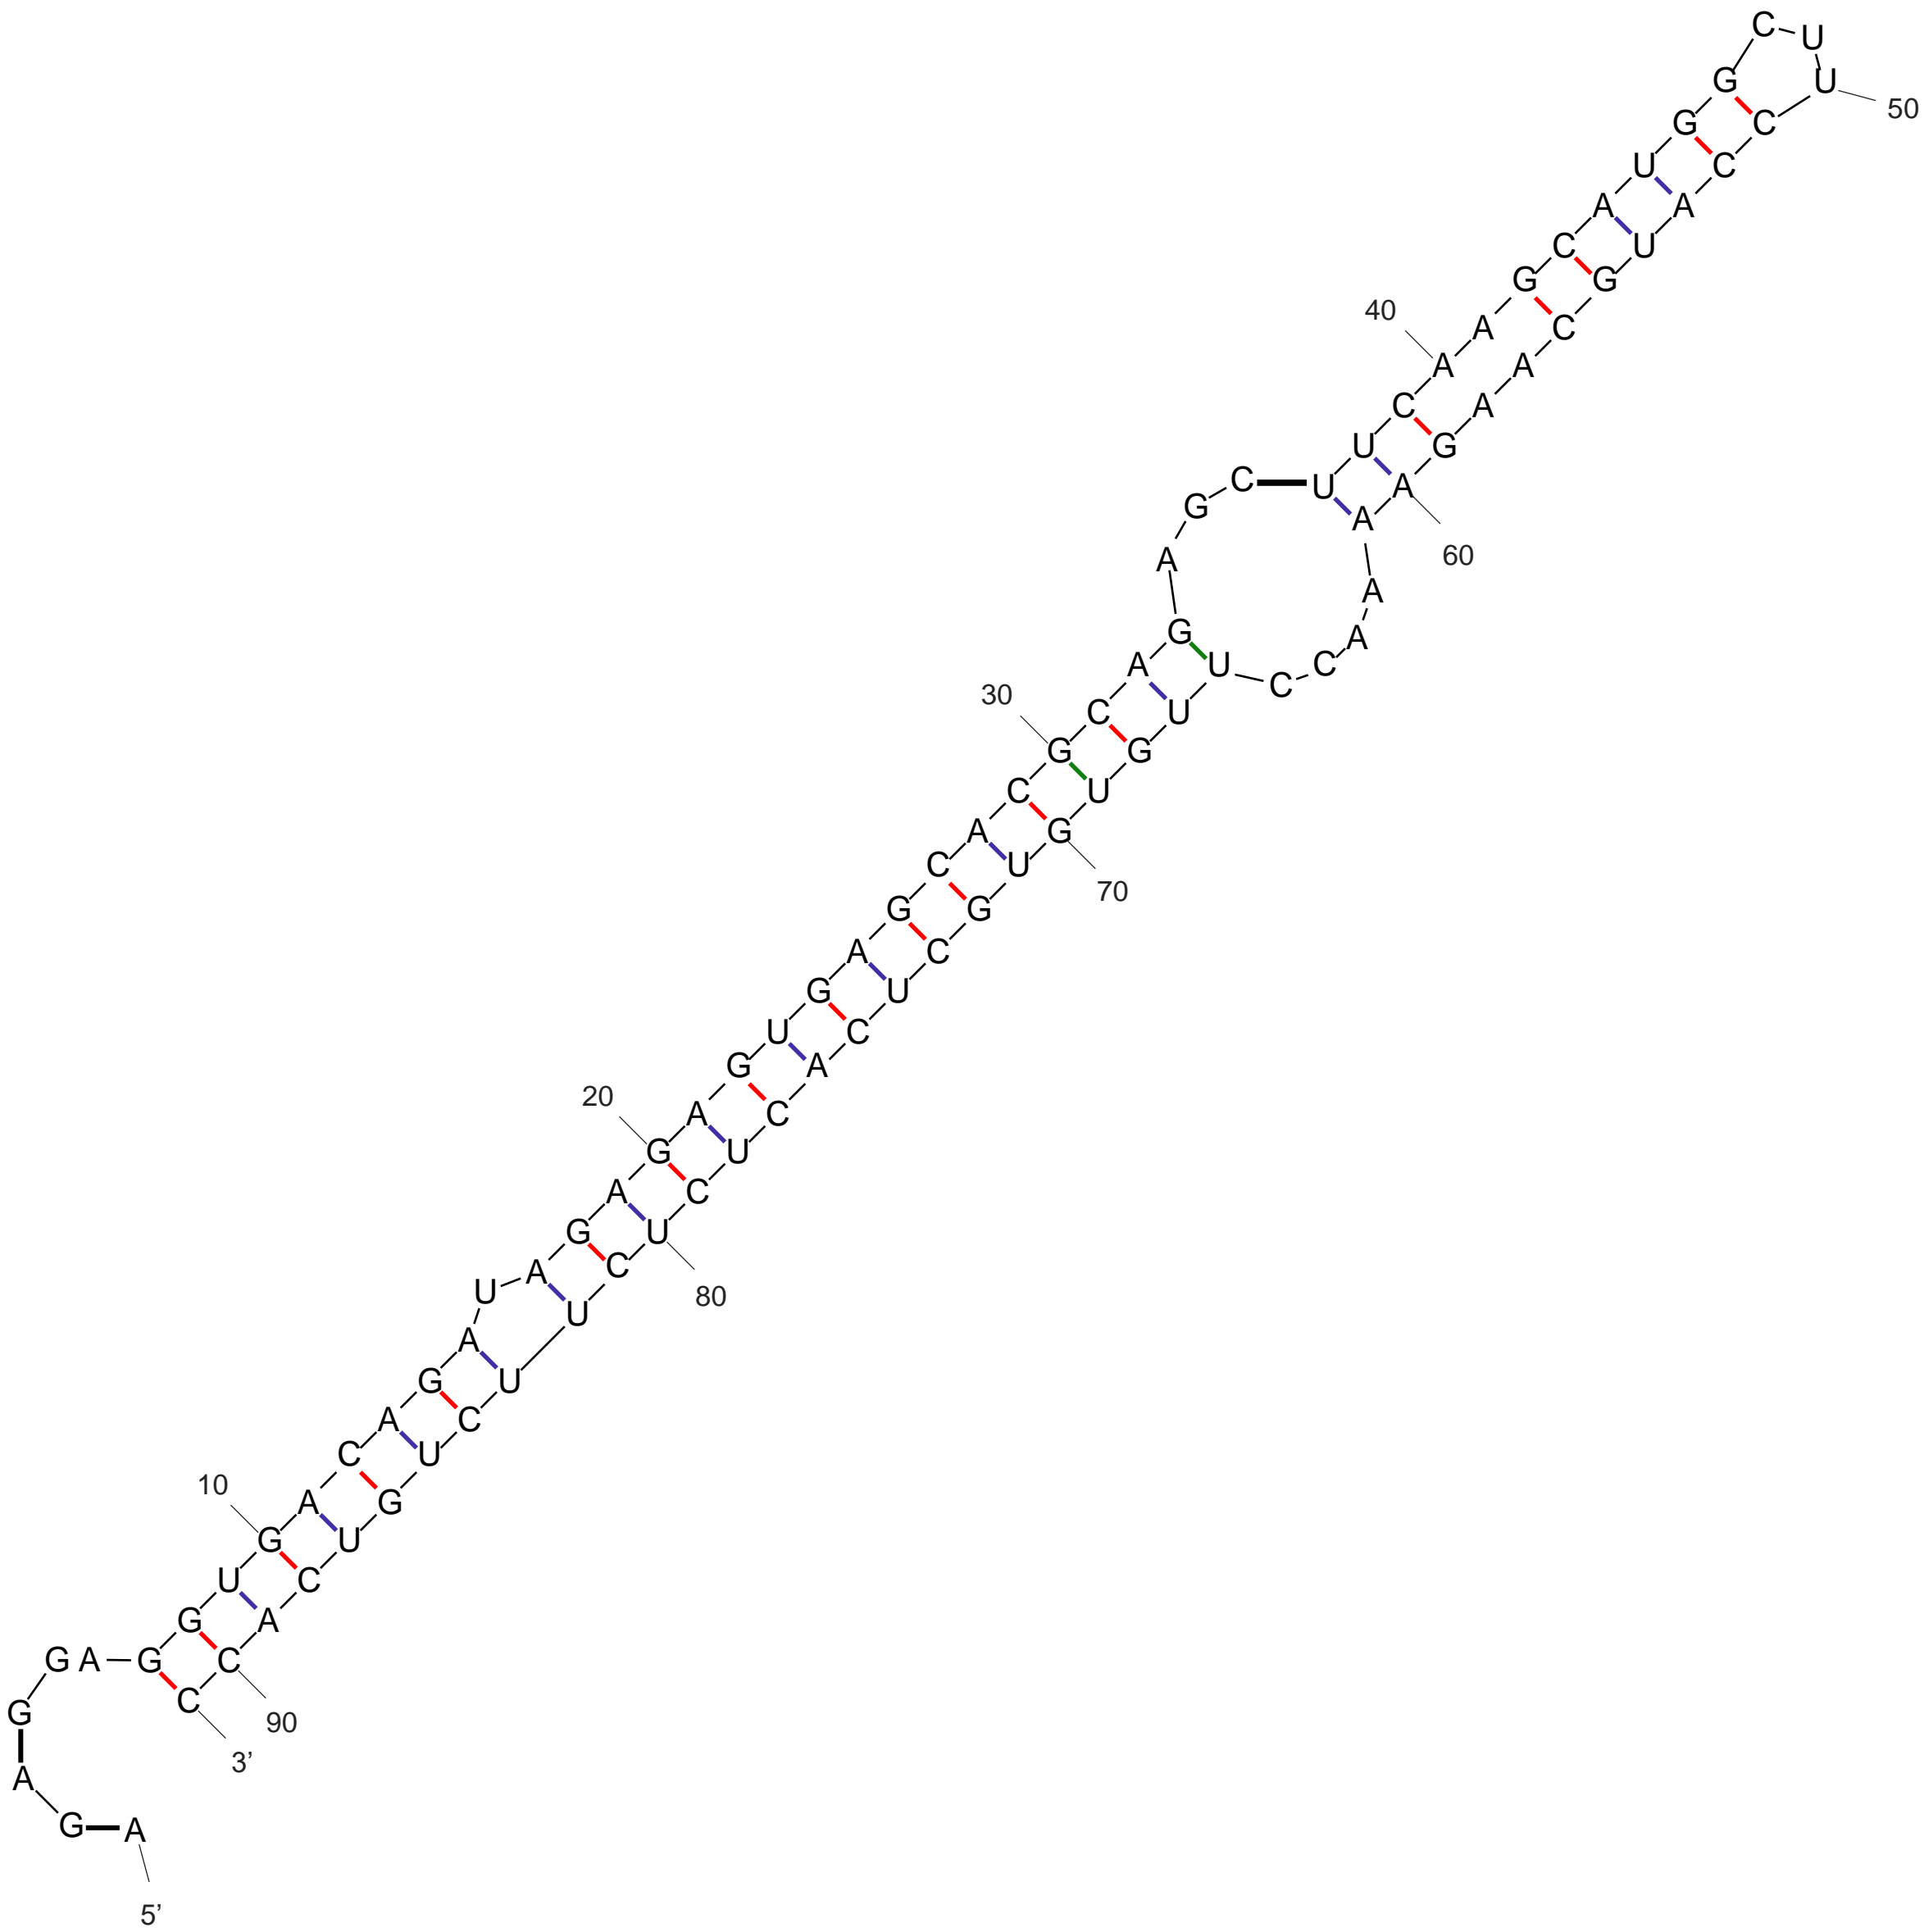

*dG = -54.50 [Initially -54.50] Pn-miR156e*



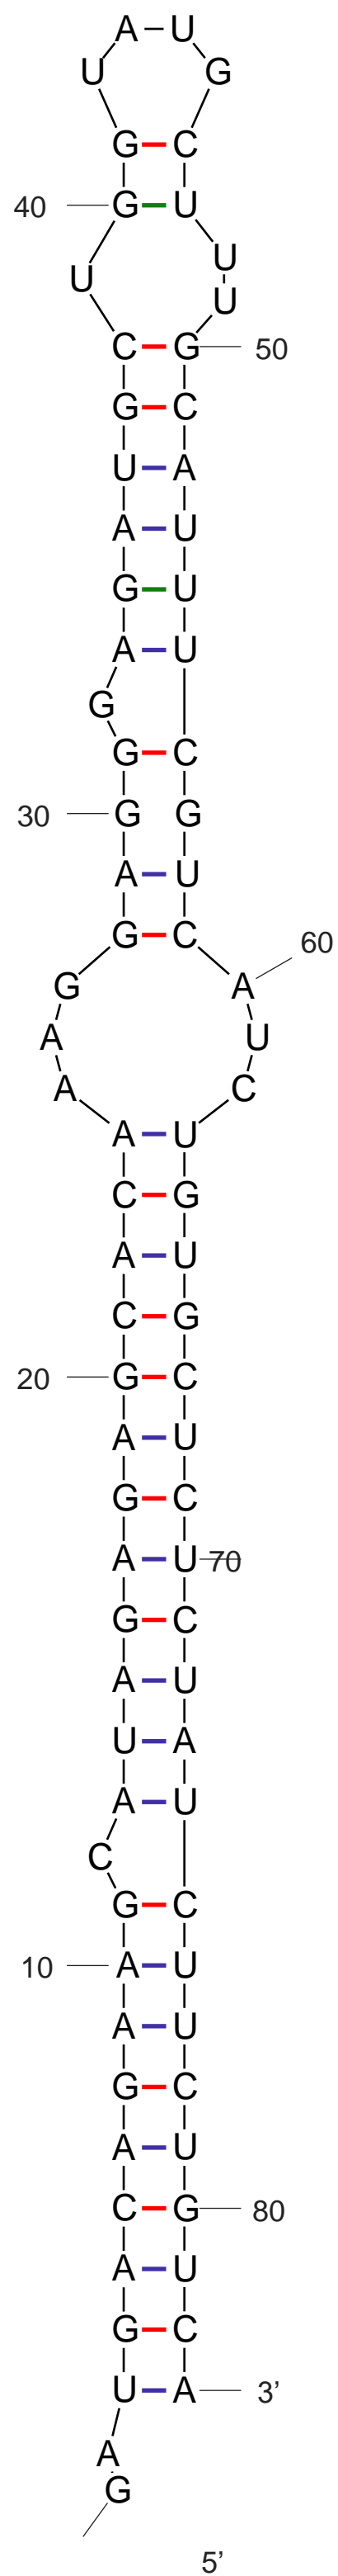

$dG = -43.60$  [Initially  $-43.60$ ] Pn-miR156g

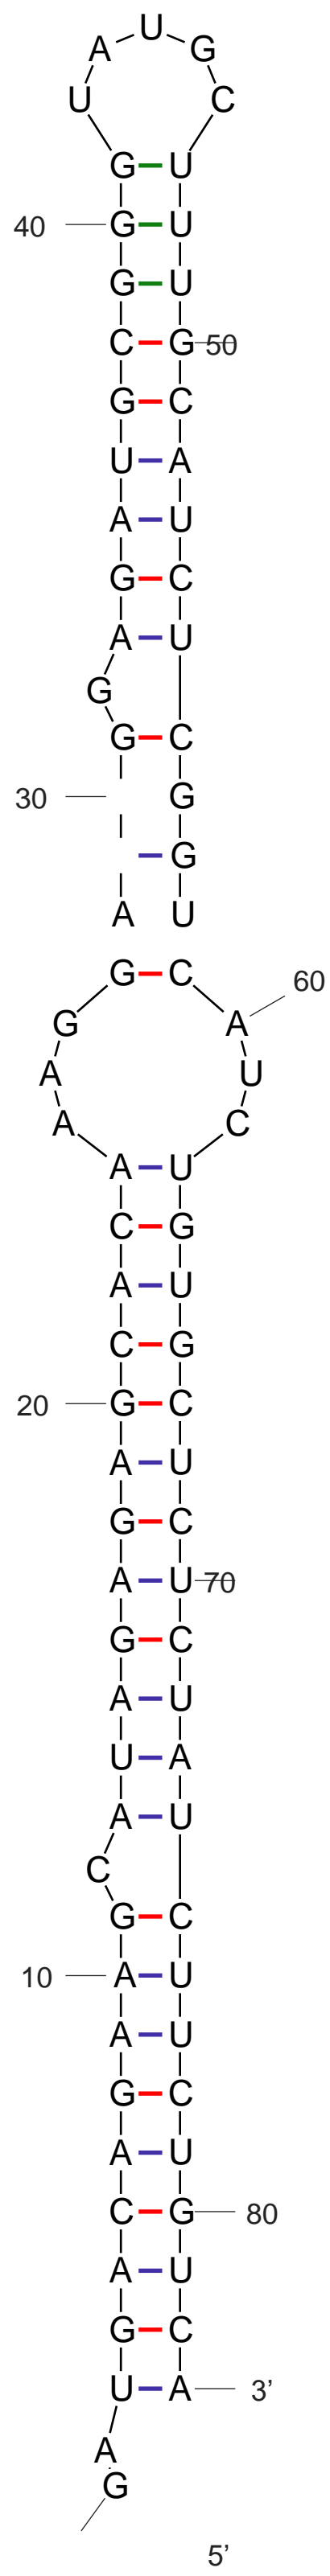



$$dG = -48.80 \text{ [Initially -48.80] Pn-miR156h}$$

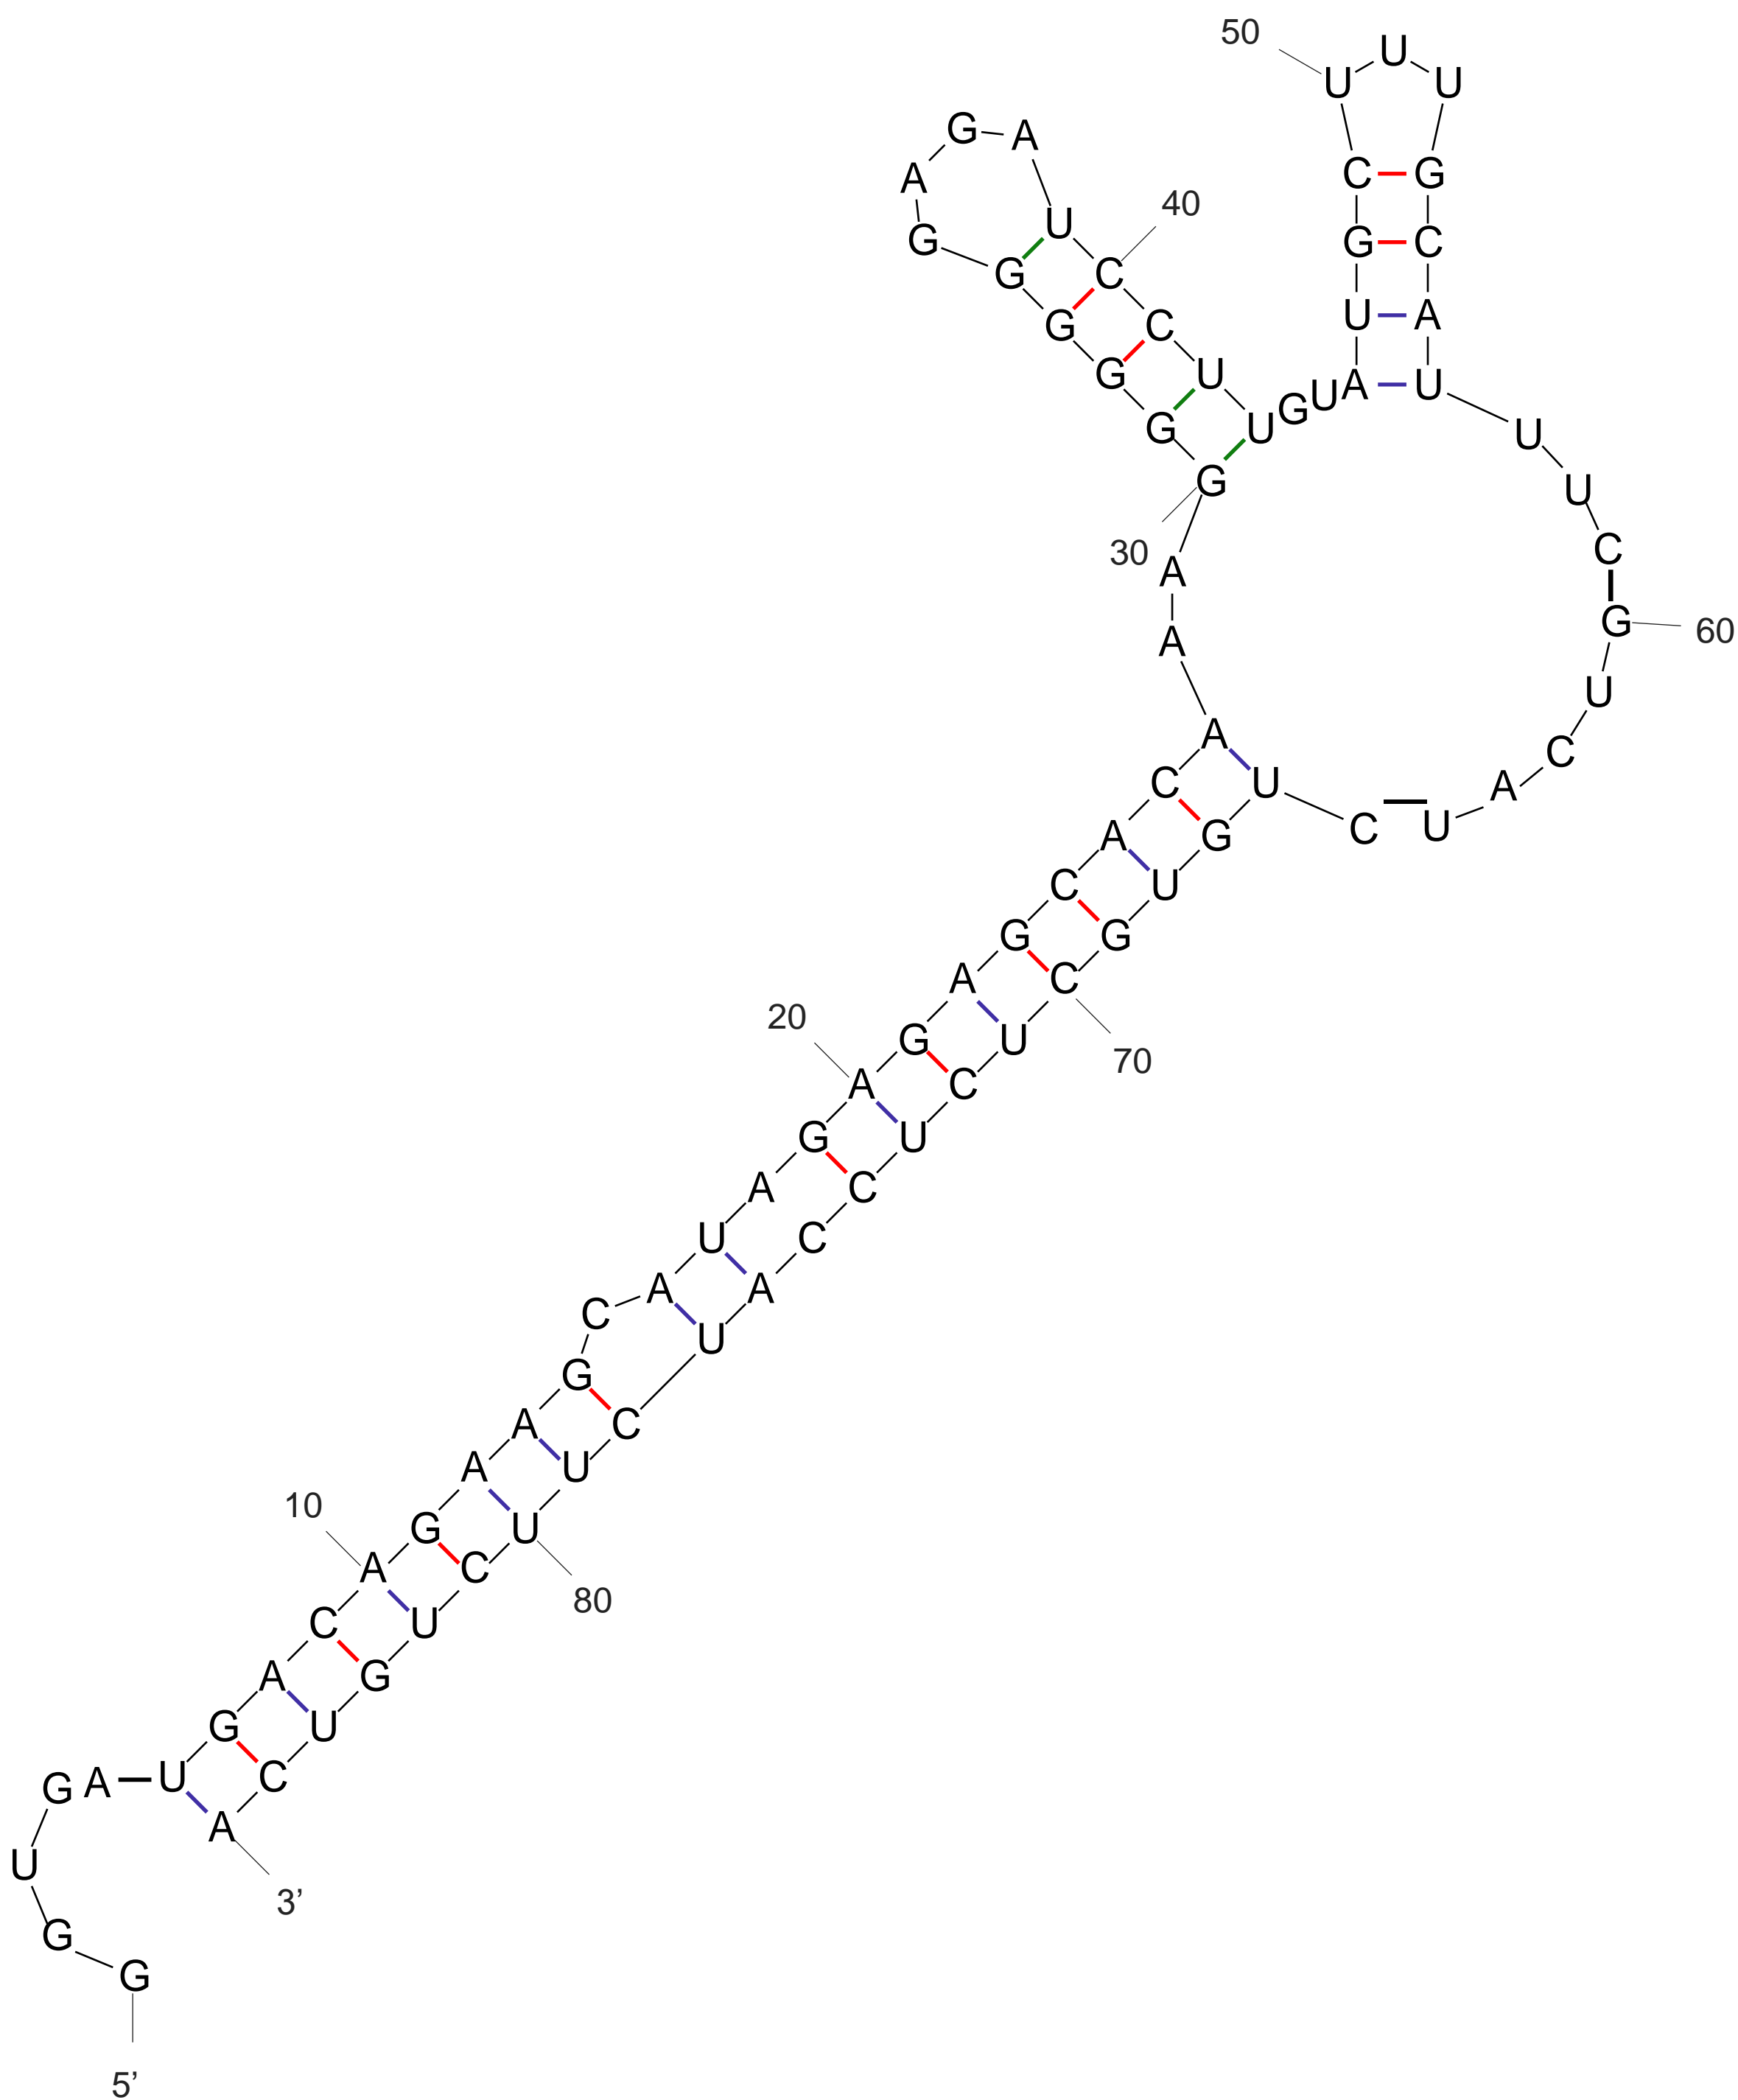

$dG = -31.95$  [Initially -35.40] Pn-miR156i

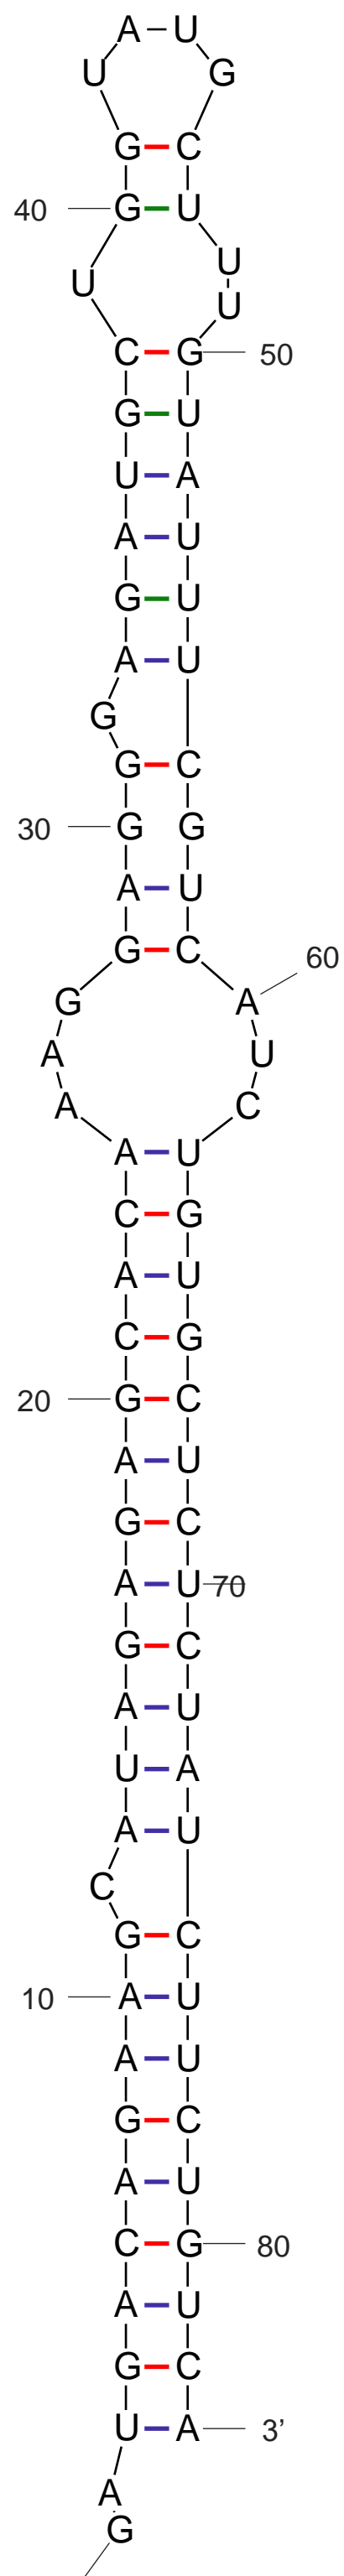
$$dG = -41.60 \text{ [Initially -41.60]} \text{ Pn-miR156j}$$

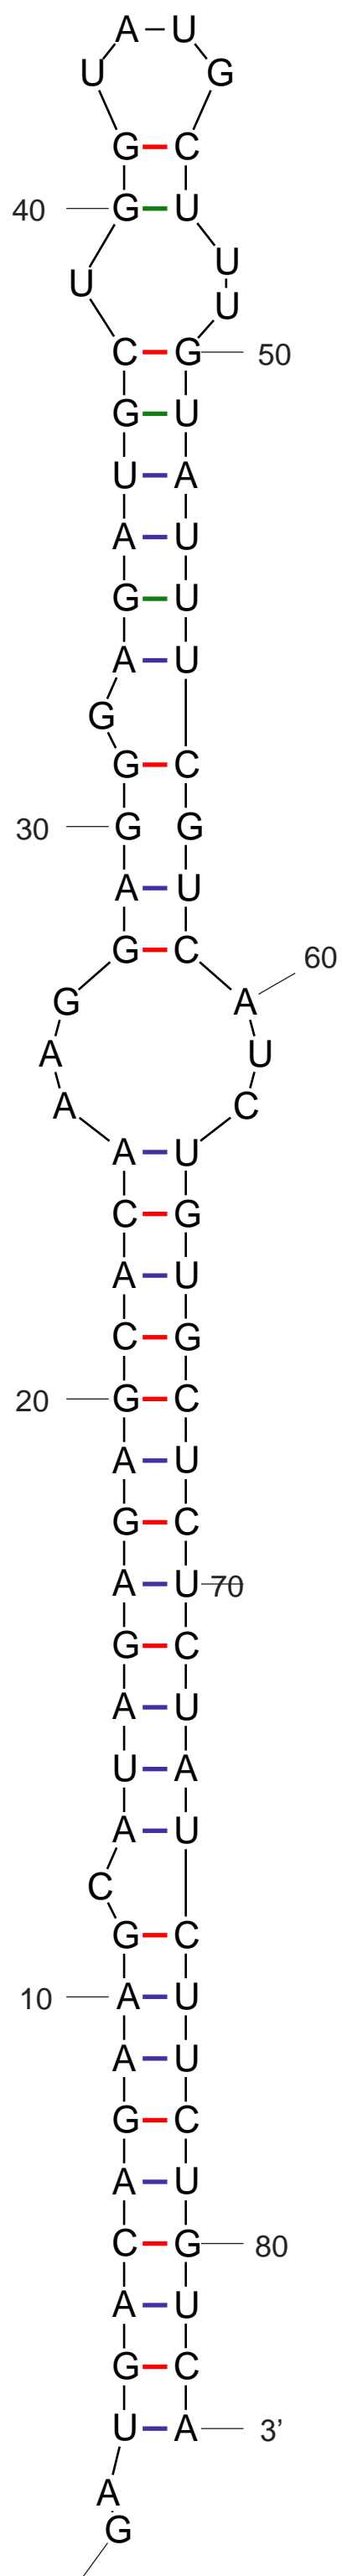

$dG = -41.60$  [Initially  $-41.60$ ] Pn-miR156k

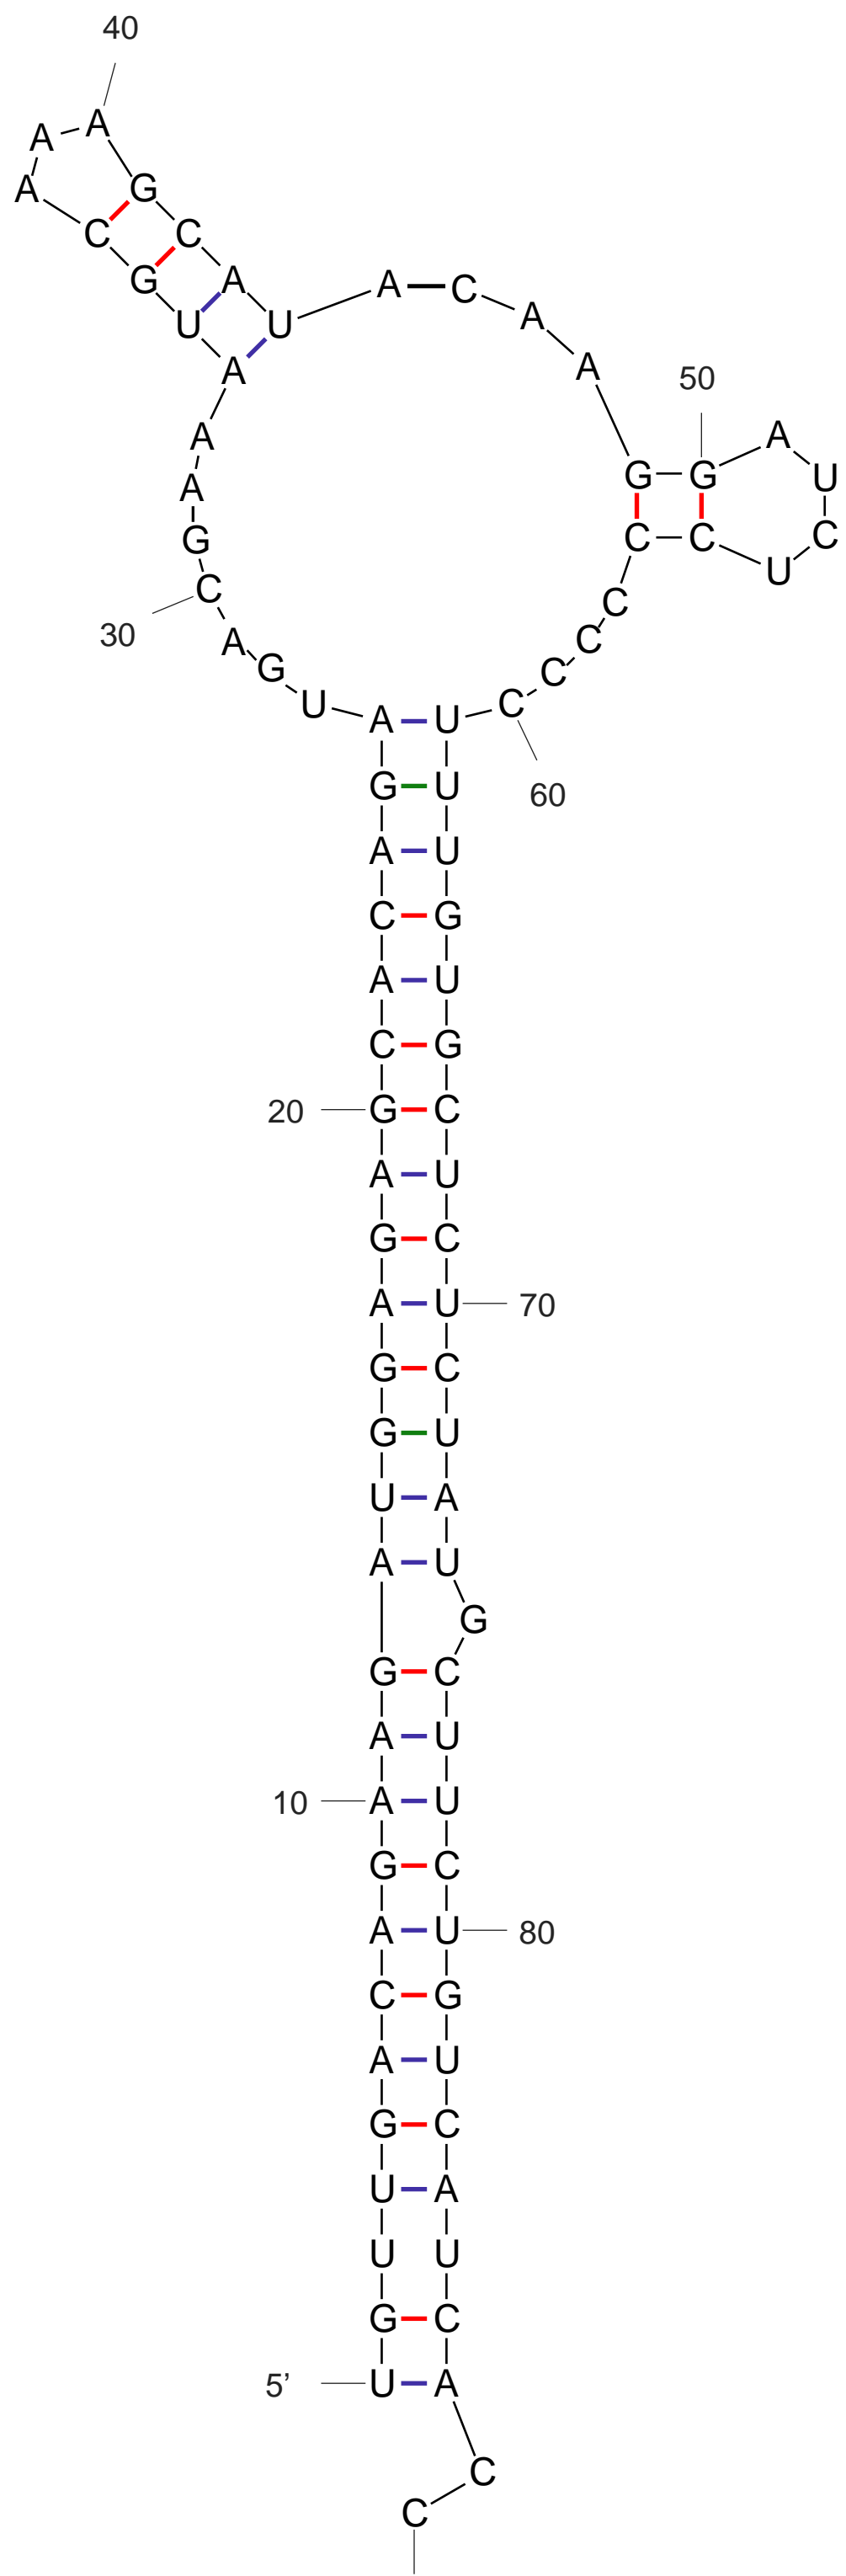

$dG = -35.49$  [Initially -38.70] Pn-miR156l











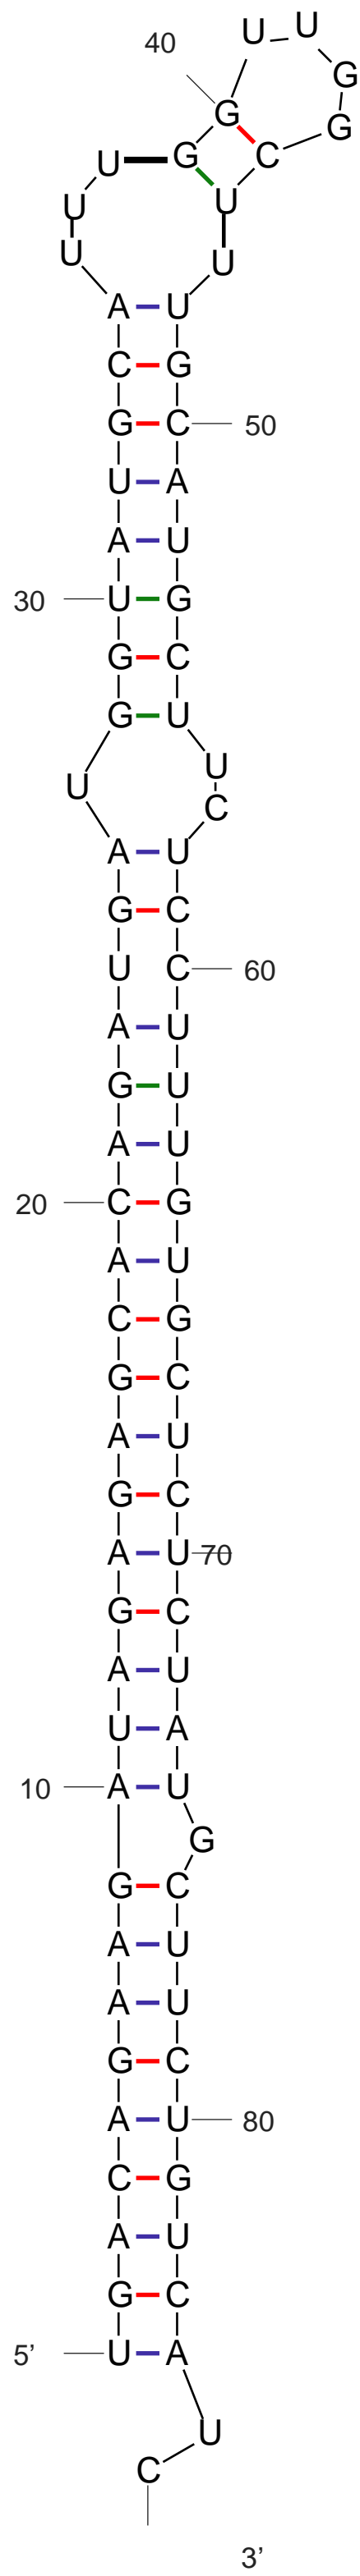

$dG = -47.20 [Initially -47.20] Pn-miR156q$

*Figure S1. The prediction of RNA secondary structure of pepper miR156s.*
