# Supplementary material for: Genome-Wide Identification and Functional Exploration of SBP-Box Gene Family in Black Pepper (Piper nigrum L.)
Source: MDPI journal article supplement (doi:10.3390/genes12111740), 2021-10-29
Supplement: s1 [file s1]

Table S1. The duplications of pepper *SBP* genes.

| <b>Type</b> | <b>Gene1</b>   | <b>Gene2</b>   |
|-------------|----------------|----------------|
| segment     | <i>PnSBP15</i> | <i>PnSBP16</i> |
| segment     | <i>PnSBP26</i> | <i>PnSBP27</i> |
| segment     | <i>PnSBP10</i> | <i>PnSBP11</i> |
| segment     | <i>PnSBP3</i>  | <i>PnSBP4</i>  |
| segment     | <i>PnSBP33</i> | <i>PnSBP34</i> |
| segment     | <i>PnSBP24</i> | <i>PnSBP25</i> |
| segment     | <i>PnSBP20</i> | <i>PnSBP21</i> |
| segment     | <i>PnSBP30</i> | <i>PnSBP31</i> |
| segment     | <i>PnSBP1</i>  | <i>PnSBP4</i>  |
| segment     | <i>PnSBP20</i> | <i>PnSBP19</i> |
| segment     | <i>PnSBP21</i> | <i>PnSBP19</i> |
| segment     | <i>PnSBP28</i> | <i>PnSBP29</i> |
| segment     | <i>PnSBP17</i> | <i>PnSBP18</i> |
| segment     | <i>PnSBP17</i> | <i>PnSBP21</i> |
| segment     | <i>PnSBP17</i> | <i>PnSBP20</i> |
| segment     | <i>PnSBP17</i> | <i>PnSBP19</i> |
| segment     | <i>PnSBP18</i> | <i>PnSBP21</i> |
| segment     | <i>PnSBP18</i> | <i>PnSBP20</i> |
| segment     | <i>PnSBP18</i> | <i>PnSBP19</i> |
| segment     | <i>PnSBP8</i>  | <i>PnSBP10</i> |
| segment     | <i>PnSBP22</i> | <i>PnSBP23</i> |
| segment     | <i>PnSBP13</i> | <i>PnSBP12</i> |
| segment     | <i>PnSBP32</i> | <i>PnSBP34</i> |
| segment     | <i>PnSBP12</i> | <i>PnSBP11</i> |
| segment     | <i>PnSBP12</i> | <i>PnSBP10</i> |
| segment     | <i>PnSBP5</i>  | <i>PnSBP7</i>  |
| segment     | <i>PnSBP5</i>  | <i>PnSBP6</i>  |
| segment     | <i>PnSBP6</i>  | <i>PnSBP7</i>  |
| tandem      | <i>PnSBP24</i> | <i>PnSBP20</i> |
| tandem      | <i>PnSBP25</i> | <i>PnSBP21</i> |
