# Supplementary material for: Genome-Wide Identification and Functional Exploration of SBP-Box Gene Family in Black Pepper (Piper nigrum L.)
Source: MDPI journal article supplement (doi:10.3390/genes12111740), 2021-10-29
Supplement: s1 [file s1]

Table S3. The distribution of miR156 binding sites in pepper *SBP* genes.

| <b>Target</b>  | <b>binding sites</b> | <b>Target start</b> | <b>Target end</b> |
|----------------|----------------------|---------------------|-------------------|
| <i>PnSBP2</i>  | GUGCUCGCUUCUUCUGUCA  | 887                 | 906               |
| <i>PnSBP12</i> | GUGCUCUCUCUCUUCUGUCA | 797                 | 816               |
| <i>PnSBP15</i> | GUGCUCUCUCUCUUCUGUCA | 626                 | 645               |
| <i>PnSBP21</i> | GUGCUCUCUCUCUUCUGUCA | 635                 | 654               |
| <i>PnSBP20</i> | GUGCUCUCUCUCUUCUGUCA | 635                 | 654               |
| <i>PnSBP8</i>  | GUGCUCUCUCUCUUCUGUCA | 773                 | 792               |
| <i>PnSBP13</i> | GUGCUCUCUCUCUUCUGUCA | 761                 | 780               |
| <i>PnSBP4</i>  | GUGCUCUCUCUCUUCUGUCA | 746                 | 765               |
| <i>PnSBP17</i> | GUGCUCUCUCUCUUCUGUCA | 683                 | 702               |
| <i>PnSBP11</i> | GUGCUCUCUCUCUUCUGUCA | 779                 | 798               |
| <i>PnSBP14</i> | GUGCUCUCUCUCUUCUGUCA | 797                 | 816               |
| <i>PnSBP1</i>  | GUGCUCUCUCUCUUCUGUCA | 815                 | 834               |
| <i>PnSBP6</i>  | GUGCUCUCUCUCUUCUGUCA | 980                 | 999               |
| <i>PnSBP10</i> | GUGCUCUCUCUCUUCUGUCA | 2450                | 2469              |
| <i>PnSBP18</i> | GUGCUUUCUCUCUUCUGUCA | 764                 | 783               |
| <i>PnSBP16</i> | GUGCUCUCUCUCUCCUGUCA | 479                 | 498               |
| <i>PnSBP3</i>  | GUGCUCUUUUUCUUCUGUCA | 620                 | 639               |
