# Supplementary material for: Genome-Wide Identification and Functional Exploration of SBP-Box Gene Family in Black Pepper (Piper nigrum L.)
Source: MDPI journal article supplement (doi:10.3390/genes12111740), 2021-10-29
Supplement: s1 [file s1]

Table S2. The information of predicted *miR156* genes in pepper genome.

| <b>ID</b>         | <b>chromosome</b> | <b>start</b> | <b>end</b> |
|-------------------|-------------------|--------------|------------|
| <i>Pn-miR156a</i> | Pn11              | 27842833     | 27842918   |
| <i>Pn-miR156b</i> | Pn15              | 24783644     | 24783724   |
| <i>Pn-miR156c</i> | Pn19              | 17106468     | 17106378   |
| <i>Pn-miR156d</i> | Pn19              | 17105920     | 17105831   |
| <i>Pn-miR156e</i> | Pn19              | 17106765     | 17106675   |
| <i>Pn-miR156f</i> | Pn23              | 1018520      | 1018430    |
| <i>Pn-miR156g</i> | Pn23              | 1046854      | 1046772    |
| <i>Pn-miR156h</i> | Pn23              | 1065414      | 1065332    |
| <i>Pn-miR156i</i> | Pn23              | 1085641      | 1085556    |
| <i>Pn-miR156j</i> | Pn23              | 1111206      | 1111124    |
| <i>Pn-miR156k</i> | Pn23              | 3992571      | 3992489    |
| <i>Pn-miR156l</i> | Pn23              | 4369605      | 4369693    |
| <i>Pn-miR156m</i> | Pn23              | 4387815      | 4387904    |
| <i>Pn-miR156n</i> | Pn23              | 4406378      | 4406467    |
| <i>Pn-miR156o</i> | Pn23              | 4433017      | 4433107    |
| <i>Pn-miR156p</i> | Pn66              | 190915       | 190996     |
| <i>Pn-miR156q</i> | Pn9               | 9331714      | 9331799    |
